# Supplementary material
Source: Springer Nature journal article supplement (https://www.springermedizin.de/resource/supplementary/12968_2012_2602_MOESM1_ESM.pdf/9582302)

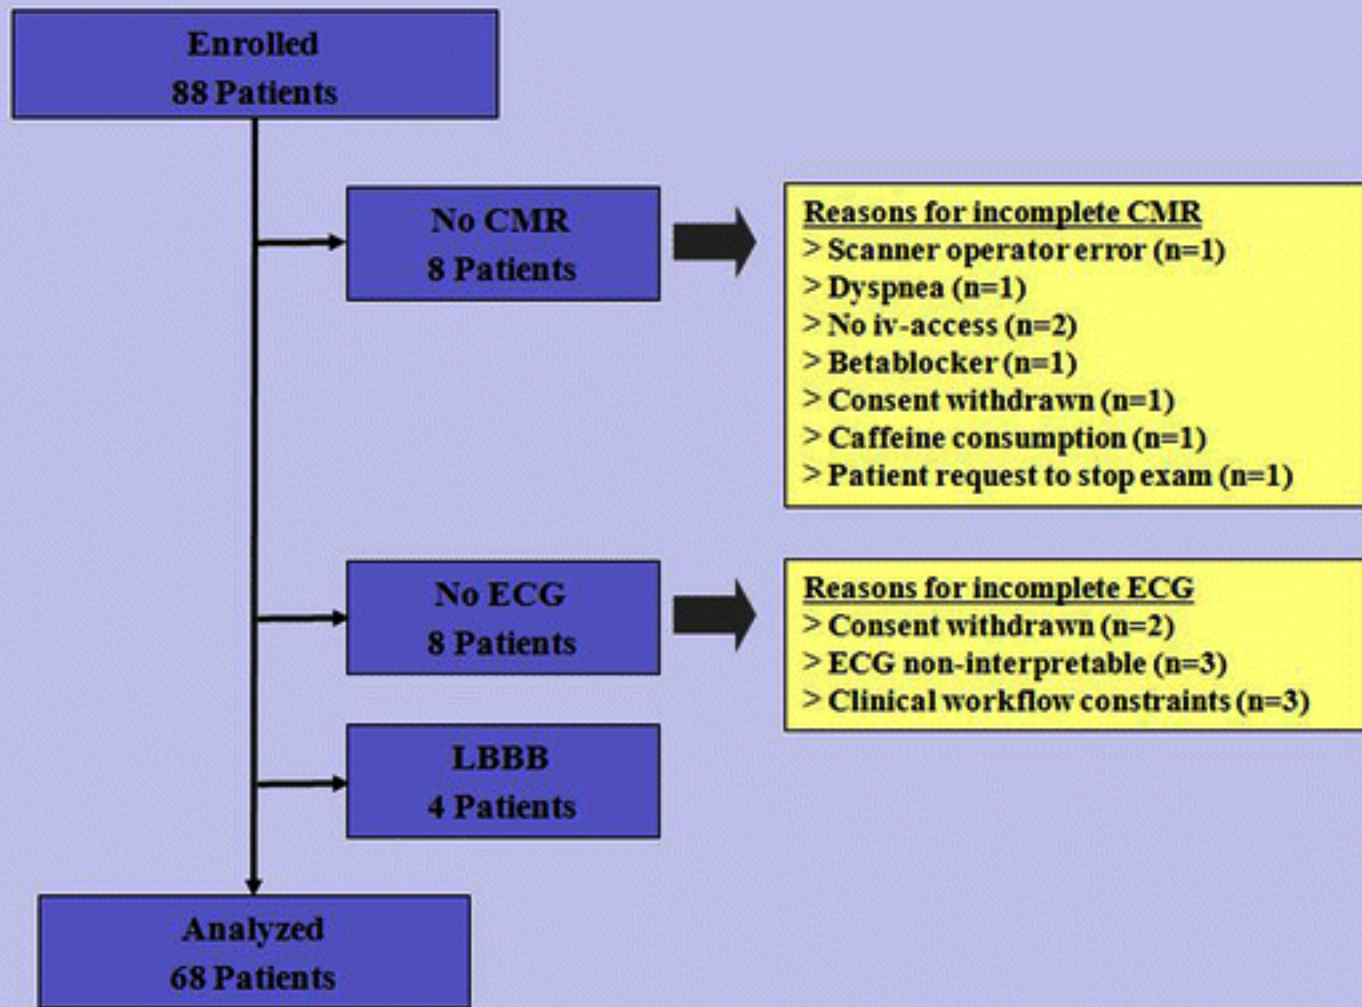

Supplement: MOESM1 [file 9582302]
